# Supplementary material for: Japanese Encephalitis Vaccine Generates Cross-Reactive Memory T Cell Responses to Zika Virus in Humans
Source: J Trop Med. 2022 Nov 19;2022:8379286. doi: 10.1155/2022/8379286 (PMC9701130; doi:10.1155/2022/8379286)
Supplement: Supplementary Materials — Table S1: the sex and age of study individuals. Figure S1: gating strategy. [file 8379286.f1.zip]

Archive with 2 entries (2 files):
- Fig S1.pdf
- Table S1.doc
