# Supplementary figures and images for: Japanese Encephalitis Vaccine Generates Cross-Reactive Memory T Cell Responses to Zika Virus in Humans
Source: Hindawi journal article supplement (doi:10.1155/2022/8379286), 2022-11-19

Supplementary material

Fig. S1 Gating strategy

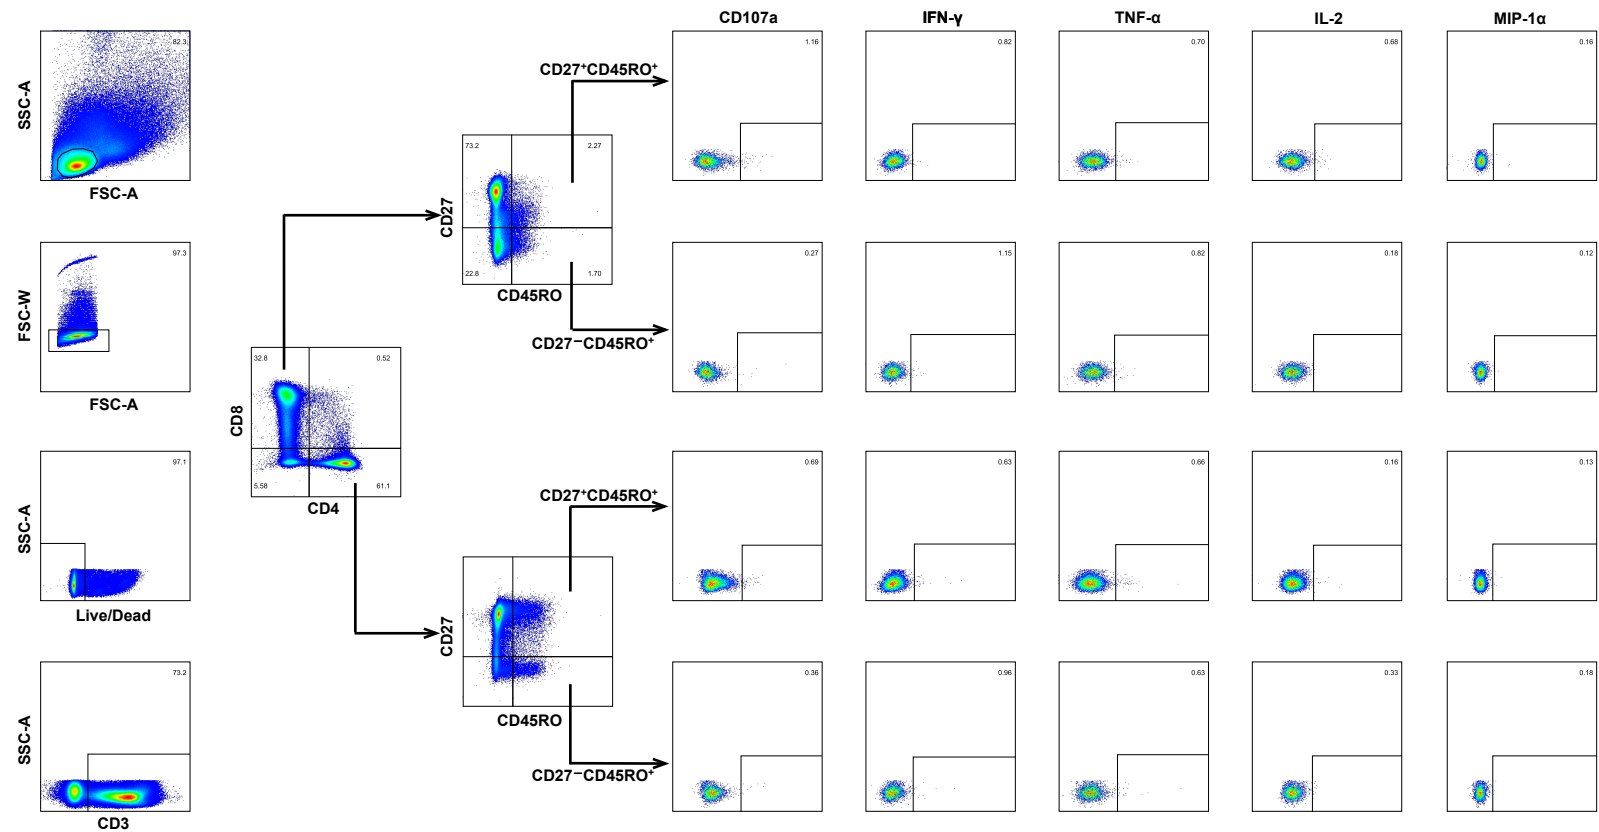

Supplement: f1 [file 8379286.f1.zip]
